# Supplementary material for: Metabolite profiling at the cellular and subcellular level reveals metabolites associated with salinity tolerance in sugar beet
Source: PubMed Central journal article supplement (PMC5854137; doi:10.1093/jxb/erx388), 2017-11-11
Supplement: erx388_suppl_supplementary_figures_s1_s2_tables_s1_s3.pdf [file erx388_suppl_supplementary_figures_s1_s2_tables_s1_s3.pdf]

**Supplementary Table S1:** List of all detectable metabolites in sugarbeet by gas chromatography-mass spectrometry (GC-MS).

| Compounds         | Quantification mass [m/z] | Compounds                         | Quantification mass [m/z] |
|-------------------|---------------------------|-----------------------------------|---------------------------|
| Glucose           | 319                       | L,L-Cystathionine                 | 218,278                   |
| Fructose          | 307                       | Homocysteine                      | 128,234                   |
| Galactose         | 319                       | Phenylalanine                     | 192                       |
| Lactose           | 361                       | Arginine                          | 157,256                   |
| Sucrose           | 361                       | Histidine                         | 154                       |
| Cellobiose        | 361                       | Lysine                            | 156                       |
| Maltose           | 480                       | Tyrosine                          | 218                       |
| Trehalose         | 361                       | Tryptophan                        | 202                       |
| Melibiose         | 204,361                   | Glutamine                         | 156                       |
| Arabinose         | 217,307                   | Glutamate                         | 230,246                   |
| Ribose            | 217                       | Ornithine                         | 142                       |
| Rhamnose          | 277                       | $\gamma$ -Aminobutyric acid(GABA) | 174,304                   |
| Glucose-6-P       | 387                       | Pyruvate                          | 174                       |
| Fructose-6-P      | 315                       | Lactate                           | 191                       |
| Ribose-5-P        | 315,299                   | Glycolate                         | 177                       |
| Ribulose-5-P      | 357                       | Succinate                         | 247,409                   |
| Sedoheptulose-7-P | 387,471                   | Fumarate                          | 245                       |
| Glycerol-3-P      | 357                       | Malate                            | 245,307                   |
| Glycerate-2-P     | 299,315,459               | Pyrogultamate                     | 230                       |
| Glycerate-3-P     | 227,299,459               | L-Aspartate                       | 100,188,232               |
| Glycerate         | 189,192                   | Citrate                           | 257                       |
| Gluconate         | 333                       | Isocitrate                        | 245,319                   |
| Gluconat-6-P      | 333,387                   | cis-Aconitate                     | 229                       |
| Xylose            | 217,307                   | 2-Isopropylmalate                 | 275                       |
| Ribitol           | 217                       | $\alpha$ -Ketoglutarate           | 198                       |
| Mannitol          | 217,319                   | 2-Hydroxyglutarate                | 203,247                   |
| Inositol          | 305                       | Phosphoenolpyruvate               | 369                       |
| Inositol-1-P      | 318                       | Oxalic acid                       | 133                       |
| Alanine           | 116                       | Gluconate-1,5-lactone             | 129,220                   |
| Valine            | 144                       | Pantothenic acid                  | 201                       |
| Leucine           | 158                       | Threonic acid                     | 292                       |
| Isoleucine        | 158                       | Threonic acid-1,4-lactone         | 217,247                   |
| Proline           | 142                       | Adenine                           | 264                       |
| Glycine           | 174                       | Adenosine                         | 236                       |
| Norleucine        | 158                       | Guanine                           | 352                       |
| Serine            | 204                       | Thymine                           | 255                       |
| Threonine         | 101                       | Uracil                            | 255,241                   |
| S-Methylcysteine  | 218                       | Cytosine                          | 240,257                   |
| $\beta$ -Alanine  | 248                       | Putrescine                        | 174                       |
| Homoserine        | 218                       | Shikimate                         | 204                       |
| Methionine        | 176                       | Dopamine                          | 174                       |
| Cysteine          | 220                       |                                   |                           |

**Supplementary Fig. S1: Outline of the experimental design.**

(A) Stepwise daily up-salting to 300 mM NaCl and harvest after 3h, or 339h (14d period). (B) Phenotype of plants growing in hydroponics.

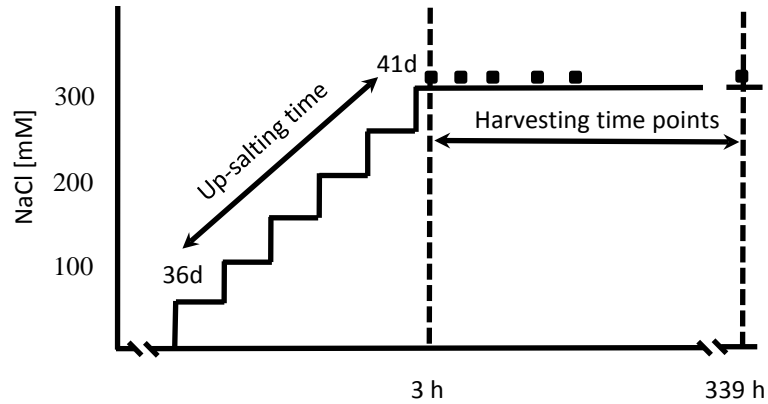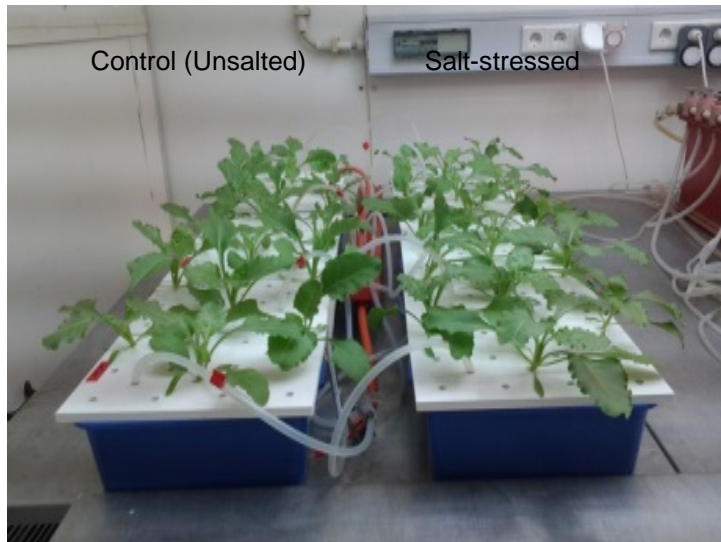

**Supplementary Fig. S2:** Schematic representation of the experimental procedure for non-aqueous isolation of chloroplast.

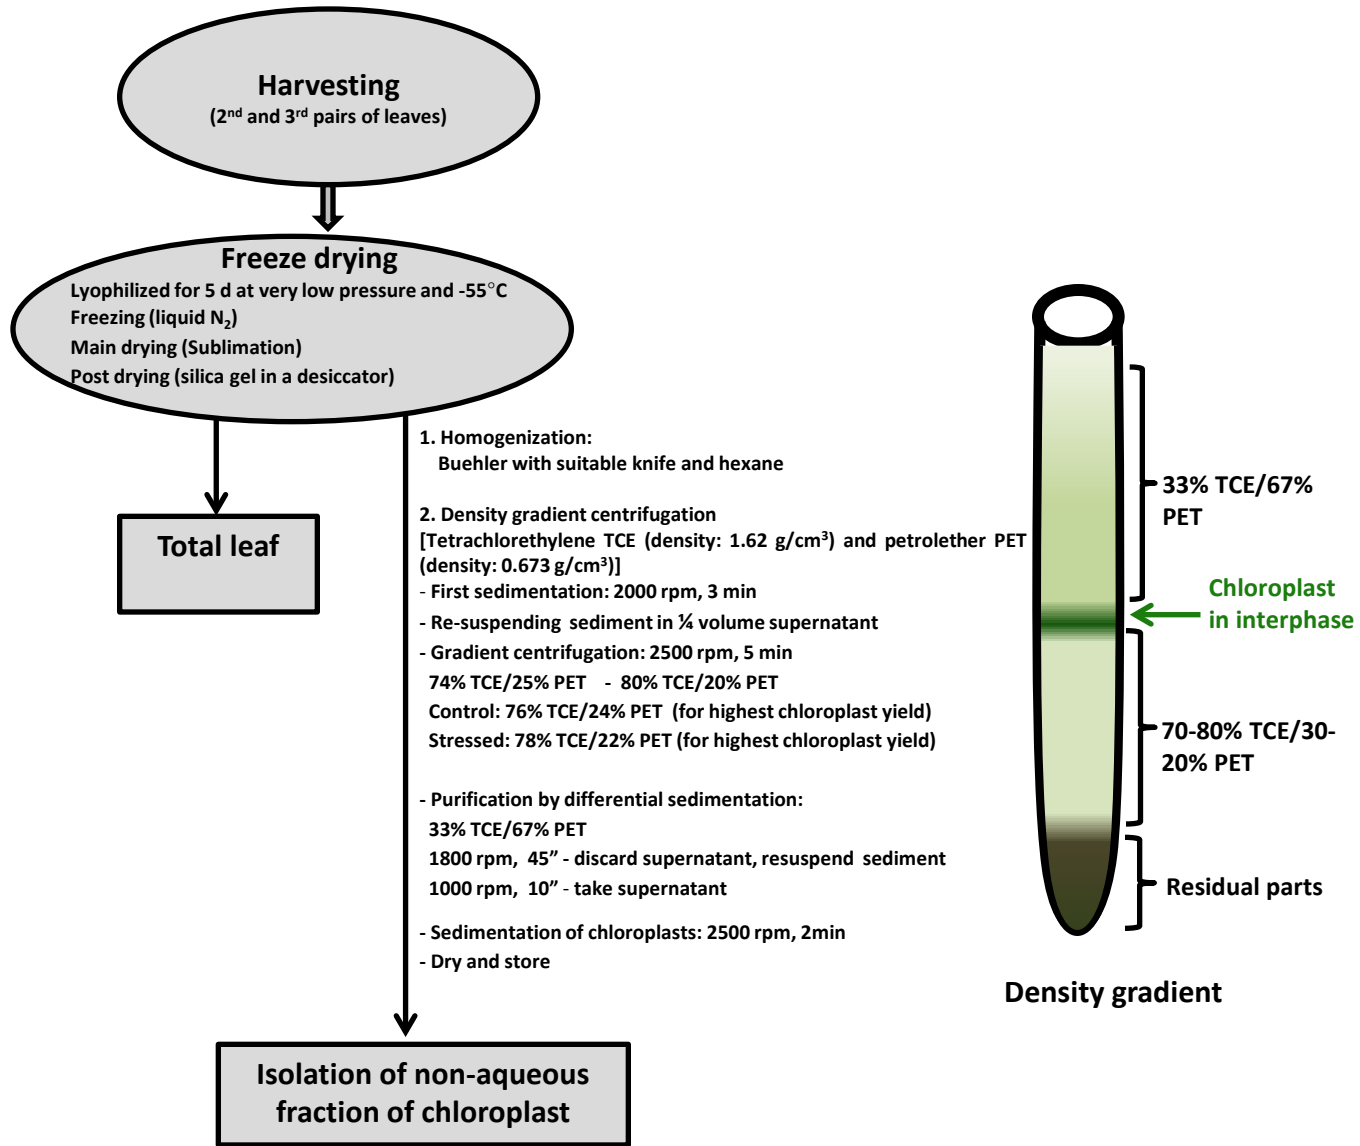

**Supplementary Table S2:** Metabolites changes in total leaf of sugarbeet. Data are means  $\pm$ SD of n=6 experiments. Data groups of significant difference were assessed with Fisher's LSD ( $p < 0.05$ ) and labelled with different letters.

| Metabolites       | [r.u./ mg DW]            |                      |                      |                      |                       |
|-------------------|--------------------------|----------------------|----------------------|----------------------|-----------------------|
|                   | Control 3h               | Stress 3h            | Control 339h         | Stress 339h          |                       |
| Sugars            | Glucose                  | 58.0 $\pm$ 2.15ab    | 61.4 $\pm$ 2.42c     | 60.3 $\pm$ 2.71bc    | 55.1 $\pm$ 2.21a      |
|                   | Fructose                 | 33.4 $\pm$ 1.41b     | 34.0 $\pm$ 0.14b     | 36.1 $\pm$ 1.85c     | 27.7 $\pm$ 1.03a      |
|                   | Galactose                | 3.11 $\pm$ 1.24a     | 7.49 $\pm$ 0.56b     | 14.2 $\pm$ 0.54d     | 11.3 $\pm$ 0.23c      |
|                   | Lactose                  | 0.136 $\pm$ 0.004a   | 0.323 $\pm$ 0.034d   | 0.201 $\pm$ 0.004c   | 0.165 $\pm$ 0.009b    |
|                   | Sucrose                  | 130.7 $\pm$ 12.12b   | 156.7 $\pm$ 2.94c    | 109.5 $\pm$ 14.84a   | 78.86 $\pm$ 15.83a    |
|                   | Cellobiose               | 0.2327 $\pm$ 0.0020c | 0.1119 $\pm$ 0.0560a | 0.1854 $\pm$ 0.0002b | 0.1997 $\pm$ 0.0097bc |
|                   | Maltose                  | 0.064 $\pm$ 0.007b   | 0.051 $\pm$ 0.004a   | 0.073 $\pm$ 0.006c   | 0.068 $\pm$ 0.006bc   |
|                   | Trehalose                | 0.30 $\pm$ 0.02b     | 0.39 $\pm$ 0.03c     | 0.26 $\pm$ 0.01a     | 0.26 $\pm$ 0.01a      |
|                   | Melibiose                | 0.52 $\pm$ 0.10a     | 0.85 $\pm$ 0.09b     | 0.73 $\pm$ 0.10b     | 0.77 $\pm$ 0.09b      |
|                   | Arabinose                | 4.28 $\pm$ 0.02a     | 9.68 $\pm$ 1.03c     | 6.56 $\pm$ 0.94b     | 16.6 $\pm$ 2.26d      |
|                   | Ribose                   | 2.31 $\pm$ 0.76a     | 3.18 $\pm$ 1.08a     | 6.18 $\pm$ 2.23b     | 7.60 $\pm$ 2.80bc     |
|                   | Rhamnose                 | 0.107 $\pm$ 0.001a   | 0.156 $\pm$ 0.002b   | 0.160 $\pm$ 0.019b   | 0.189 $\pm$ 0.007c    |
|                   | Xylose                   | 1.064 $\pm$ 0.003b   | 1.467 $\pm$ 0.108c   | 0.813 $\pm$ 0.051a   | 0.821 $\pm$ 0.012a    |
|                   | Ribitol                  | 16.22 $\pm$ 0.406a   | 18.83 $\pm$ 0.013d   | 16.83 $\pm$ 0.003b   | 18.27 $\pm$ 0.004c    |
|                   | Mannitol                 | 0.121 $\pm$ 0.007a   | 0.284 $\pm$ 0.080b   | 0.129 $\pm$ 0.427a   | 0.269 $\pm$ 0.217b    |
|                   | Inositol                 | 9.22 $\pm$ 1.33a     | 19.9 $\pm$ 1.53d     | 13.7 $\pm$ 0.02b     | 18.5 $\pm$ 0.02c      |
|                   | Glycerate                | 20.6 $\pm$ 0.64a     | 26.3 $\pm$ 2.16b     | 24.8 $\pm$ 0.72b     | 24.6 $\pm$ 1.61b      |
|                   | Gluconate                | 8.1 $\pm$ 0.2c       | 6.4 $\pm$ 0.4b       | 9.6 $\pm$ 0.2d       | 5.7 $\pm$ 0.4a        |
|                   | Phosphorylated compounds | Glucose-6-P          | 6.2 $\pm$ 0.5c       | 2.5 $\pm$ 0.3b       | 7.2 $\pm$ 0.7d        |
| Fructose-6-P      |                          | 3.21 $\pm$ 0.08c     | 1.56 $\pm$ 0.24b     | 4.08 $\pm$ 0.21d     | 0.41 $\pm$ 0.23a      |
| Ribose-5-P        |                          | 0.230 $\pm$ 0.010b   | 0.279 $\pm$ 0.007c   | 0.278 $\pm$ 0.027c   | 0.213 $\pm$ 0.011a    |
| Ribulose-5-P      |                          | 0.125 $\pm$ 0.008c   | 0.094 $\pm$ 0.035b   | 0.154 $\pm$ 0.024d   | 0.045 $\pm$ 0.007a    |
| Sedoheptulose-7-P |                          | 0.74 $\pm$ 0.12c     | 0.29 $\pm$ 0.03b     | 1.00 $\pm$ 0.19d     | 0.05 $\pm$ 0.03a      |
| Glycerol-3-P      |                          | 8.2 $\pm$ 1.0b       | 3.1 $\pm$ 0.2a       | 8.7 $\pm$ 1.2b       | 1.9 $\pm$ 0.6a        |
| Glycerate-2-P     |                          | 1.09 $\pm$ 0.17b     | 0.62 $\pm$ 0.06a     | 1.34 $\pm$ 0.23c     | 0.72 $\pm$ 0.06a      |
| Glycerate-3-P     |                          | 4.9 $\pm$ 1.2c       | 4.0 $\pm$ 0.2bc      | 3.0 $\pm$ 0.8b       | 1.4 $\pm$ 1.1a        |
| Gluconate-6-P     |                          | 0.33 $\pm$ 0.01ab    | 0.38 $\pm$ 0.04b     | 0.29 $\pm$ 0.01a     | 0.52 $\pm$ 0.07c      |
| Inositol-1-P      |                          | 1.53 $\pm$ 0.05ab    | 1.96 $\pm$ 0.12c     | 1.64 $\pm$ 1.31b     | 1.37 $\pm$ 0.68a      |
| Amino acids       | Alanine                  | 30.4 $\pm$ 5.56c     | 18.2 $\pm$ 2.14a     | 24.6 $\pm$ 2.27b     | 16.5 $\pm$ 1.23a      |
|                   | Valine                   | 7.6 $\pm$ 0.4ab      | 6.5 $\pm$ 0.6a       | 7.2 $\pm$ 1.2ab      | 8.4 $\pm$ 0.5b        |
|                   | Leucine                  | 0.45 $\pm$ 0.14a     | 0.82 $\pm$ 0.03b     | 0.67 $\pm$ 0.14b     | 2.72 $\pm$ 0.53c      |
|                   | Isoleucine               | 5.56 $\pm$ 0.86c     | 4.15 $\pm$ 0.12a     | 4.67 $\pm$ 0.03ab    | 4.82 $\pm$ 0.085b     |
|                   | Proline                  | 11.1 $\pm$ 4.32a     | 40.8 $\pm$ 5.69b     | 14.1 $\pm$ 5.12a     | 34.5 $\pm$ 3.23b      |
|                   | Glycine                  | 7.8 $\pm$ 0.3bc      | 8.3 $\pm$ 0.1c       | 6.6 $\pm$ 0.6a       | 6.0 $\pm$ 0.6a        |
|                   | Norleucine               | 0.6 $\pm$ 0.3a       | 4.4 $\pm$ 2.0b       | 0.8 $\pm$ 0.6a       | 0.6 $\pm$ 0.2a        |
|                   | Serine                   | 33.0 $\pm$ 0.95b     | 53.1 $\pm$ 4.46d     | 23.6 $\pm$ 6.00a     | 45.7 $\pm$ 2.78c      |
|                   | Threonine                | 4.49 $\pm$ 0.03a     | 5.17 $\pm$ 0.24b     | 4.31 $\pm$ 0.29a     | 4.91 $\pm$ 0.03b      |
|                   | S-Methylcysteine         | 0.025 $\pm$ 0.004a   | 0.029 $\pm$ 0.001a   | 0.070 $\pm$ 0.019bc  | 0.064 $\pm$ 0.001b    |
|                   | $\beta$ -Alanine         | 0.69 $\pm$ 0.01b     | 0.69 $\pm$ 0.03ab    | 0.73 $\pm$ 0.01c     | 0.67 $\pm$ 0.02a      |
|                   | Homoserine               | 0.93 $\pm$ 0.06d     | 0.25 $\pm$ 0.03a     | 0.35 $\pm$ 0.07b     | 0.47 $\pm$ 0.07c      |

|               |                            |              |               |              |              |
|---------------|----------------------------|--------------|---------------|--------------|--------------|
|               | Methionine                 | 0.32±0.01a   | 0.42±0.07b    | 0.61±0.04c   | 0.63±0.01c   |
|               | Cysteine                   | 0.20±0.06a   | 0.25±0.04a    | 0.28±0.06b   | 0.22±0.03ab  |
|               | L,L-Cystathionine          | 0.061±0.011c | 0.044±0.004b  | 0.039±0.001b | 0.021±0.006a |
|               | Homocysteine               | 0.178±0.003a | 0.322±0.008b  | 0.271±0.040b | 0.302±0.027b |
|               | Phenylalanine              | 0.89±0.17a   | 0.56±0.24a    | 1.35±0.09b   | 1.44±0.08b   |
|               | Arginine                   | 0.041±0.011a | 0.031±0.009a  | 0.134±0.011b | 0.040±0.028b |
|               | Histidine                  | 0.30±0.03a   | 0.30±0.03ab   | 0.33±0.01b   | 0.33±0.02ab  |
|               | Lysine                     | 0.7±0.1a     | 0.7±0.3a      | 4.8±0.1b     | 6.8±1.0c     |
|               | Tyrosine                   | 2.7±0.1c     | 0.4±0.6a      | 2.1±0.2b     | 1.8±0.4b     |
|               | Tryptophan                 | 0.11±0.05a   | 0.11±0.1a     | 0.15±0.07a   | 0.16±0.11a   |
|               | Glutamine                  | 11.1±1.72a   | 10.2±3.00a    | 9.02±4.06a   | 9.31±3.36a   |
|               | Glutamate                  | 57.9±4.62c   | 64.9±5.04cd   | 39.3±5.13a   | 46.2±4.22b   |
|               | Ornithine                  | 0.24±0.01b   | 0.20±0.03a    | 0.49±0.04d   | 0.41±0.01c   |
|               | γ-Aminobutyric acid (GABA) | 30.6±0.54a   | 55.8±10.1b    | 82.9±7.09c   | 78.8±17.5c   |
| Organic acids | Pyruvate                   | 0.52±0.04b   | 0.73±0.08c    | 0.42±0.11a   | 0.47±0.01a   |
|               | Lactate                    | 0.32±0.02b   | 0.19±0.02a    | 0.42±0.01c   | 0.75±0.04d   |
|               | Glycolate                  | 0.63±0.02a   | 1.24±0.20c    | 0.98±0.03b   | 1.15±0.14bc  |
|               | Succinate                  | 3.6±0.2b     | 2.4±0.7b      | 2.6±0.3b     | 0.5±0.1a     |
|               | Fumarate                   | 2.9±0.4b     | 3.1±0.4b      | 3.3±0.1b     | 1.8±0.4a     |
|               | Malate                     | 24.7±2.12a   | 32.4±2.31b    | 31.4±1.96ab  | 30.0±3.18ab  |
|               | Pyroglutamate              | 81.1±2.66c   | 77.3±4.44bc   | 54.5±9.48a   | 69.5±11.7b   |
|               | L-Aspartate                | 104.4±5.930c | 91.73±6.042b  | 113.6±5.668d | 63.49±9.88a  |
|               | Citrate                    | 15.6±0.88b   | 14.3±2.20b    | 19.5±1.38c   | 10.8±2.19a   |
|               | Isocitrate                 | 1.8±0.4b     | 1.6±0.1b      | 1.3±0.3b     | 0.9±0.2a     |
|               | cis-Aconitate              | 0.24±0.02b   | 0.20±0.02b    | 0.37±0.01c   | 0.15±0.01a   |
|               | 2-Isopropylmalate          | 0.149±0.012b | 0.115±0.01b   | 0.111±0.008b | 0.061±0.004a |
|               | α-Ketoglutarate            | 0.75±0.18b   | 0.81±0.02b    | 0.50±0.03a   | 0.61±0.01a   |
|               | 2-Hydroxyglutarate         | 0.326±0.004b | 0.428±0.087bc | 0.270±0.011a | 0.169±0.022a |
|               | Phosphoenolpyruvate        | 0.300±0.065c | 0.039±0.004a  | 0.155±0.007b | 0.023±0.014a |
|               | Oxalic acid                | 9.85±0.87ab  | 11.2±1.12b    | 10.7±0.69b   | 8.56±0.81a   |
|               | Gluconate-1,5-lactone      | 1.3±0.2a     | 1.9±0.1b      | 1.0±0.5ab    | 2.9±0.4c     |
|               | Pantothenic acid           | 0.267±0.001a | 0.210±0.010b  | 0.269±0.061a | 0.161±0.059a |
|               | Threonic acid              | 9.51±0.93a   | 8.74±3.17a    | 19.0±0.01b   | 9.56±0.01a   |
|               | Threonic acid-1,4-lactone  | 0.55±0.05a   | 1.01±0.13b    | 1.49±0.05c   | 0.56±0.05a   |
| Miscellaneous | Adenine                    | 4.24±0.20a   | 5.76±0.23b    | 20.5±0.14c   | 23.0±0.02d   |
|               | Adenosine                  | 0.51±0.02b   | 0.29±0.02a    | 0.28±0.08a   | 0.59±0.06b   |
|               | Guanine                    | 0.212±0.005b | 0.283±0.01a   | 0.316±0.060c | 0.340±0.018d |
|               | Thymine                    | 0.113±0.008a | 0.366±0.044c  | 0.112±0.012a | 0.175±0.015b |
|               | Uracil                     | 0.22±0.01a   | 0.28±0.03b    | 0.32±0.01b   | 0.30±0.01b   |
|               | cytosine                   | 0.012±0.001a | 0.748±0.045c  | 0.075±0.032b | 0.069±0.019b |
|               | Putrescine                 | 0.78±0.09a   | 1.14±0.09b    | 0.82±0.04a   | 0.71±0.81a   |
|               | Shikimate                  | 0.62±0.11bc  | 0.49±0.08b    | 0.48±0.02b   | 0.33±0.2ab   |
|               | Dopamine                   | 36.2±6.88c   | 24.3±0.46ab   | 28.1±0.04b   | 23.4±0.06a   |

**Supplementary Table S3:** Metabolites changes in different fractions of sugarbeet. Data are means  $\pm$ SD of n=6 experiments. Data groups of significant difference were assessed with Fisher's LSD ( $p < 0.05$ ) and labelled with different letters.

| Metabolites              | Extra chloroplast space [r.u./ $\mu$ g chlorophyll] |                      |                      |                      | Chloroplast [r.u./ $\mu$ g chlorophyll] |                      |                      |                      |                      |
|--------------------------|-----------------------------------------------------|----------------------|----------------------|----------------------|-----------------------------------------|----------------------|----------------------|----------------------|----------------------|
|                          | Control 3h                                          | Stress 3h            | Control 339h         | Stress 339h          | Control 3h                              | Stress 3h            | Control 339h         | Stress 339h          |                      |
| Sugars                   | Glucose                                             | 5.8 $\pm$ 0.9g       | 5.4 $\pm$ 0.9f       | 3.9 $\pm$ 0.6d       | 4.7 $\pm$ 0.9e                          | 0.7 $\pm$ 0.2a       | 1.0 $\pm$ 0.1b       | 1.0 $\pm$ 0.1ab      | 1.3 $\pm$ 0.1c       |
|                          | Fructose                                            | 3.3 $\pm$ 0.9f       | 2.9 $\pm$ 0.4e       | 2.3 $\pm$ 0.4d       | 2.1 $\pm$ 0.4d                          | 0.4 $\pm$ 0.2a       | 0.6 $\pm$ 0.1b       | 0.7 $\pm$ 0.2b       | 0.9 $\pm$ 0.2c       |
|                          | Galactose                                           | 0.41 $\pm$ 0.07c     | 0.60 $\pm$ 0.11d     | 0.97 $\pm$ 0.24e     | 1.00 $\pm$ 0.24e                        | 0.05 $\pm$ 0.02a     | 0.29 $\pm$ 0.09bc    | 0.24 $\pm$ 0.08b     | 0.24 $\pm$ 0.09b     |
|                          | Lactose                                             | 0.013 $\pm$ 0.009c   | 0.029 $\pm$ 0.005d   | 0.01 $\pm$ 0.006c    | 0.012 $\pm$ 0.002c                      | 0.003 $\pm$ 0.002a   | 0.004 $\pm$ 0.002a   | 0.006 $\pm$ 0.005b   | 0.007 $\pm$ 0.004b   |
|                          | Sucrose                                             | 11.7 $\pm$ 1.41d     | 13.3 $\pm$ 1.51e     | 5.45 $\pm$ 1.66c     | 6.66 $\pm$ 0.89c                        | 3.04 $\pm$ 0.56b     | 3.48 $\pm$ 0.82b     | 2.98 $\pm$ 1.13b     | 1.13 $\pm$ 0.41a     |
|                          | Cellobiose                                          | 0.0232 $\pm$ 0.0053e | 0.0099 $\pm$ 0.0003d | 0.0134 $\pm$ 0.0033d | 0.0182 $\pm$ 0.0020e                    | 0.0032 $\pm$ 0.0011b | 0.0077 $\pm$ 0.0007c | 0.0002 $\pm$ 0.0005a | 0.0029 $\pm$ 0.0003b |
|                          | Maltose                                             | 0.0049 $\pm$ 0.0010b | 0.0036 $\pm$ 0.0011b | 0.0046 $\pm$ 0.0013b | 0.0066 $\pm$ 0.0011c                    | 0.0033 $\pm$ 0.0011b | 0.0035 $\pm$ 0.0012b | 0.0012 $\pm$ 0.0003a | 0.0009 $\pm$ 0.0009a |
|                          | Trehalose                                           | 0.032 $\pm$ 0.003e   | 0.040 $\pm$ 0.006f   | 0.018 $\pm$ 0.005d   | 0.023 $\pm$ 0.004d                      | 0.001 $\pm$ 0.002a   | 0.011 $\pm$ 0.005c   | 0.002 $\pm$ 0.003a   | 0.006 $\pm$ 0.002b   |
|                          | Melibiose                                           | 0.045 $\pm$ 0.008bc  | 0.060 $\pm$ 0.009c   | 0.045 $\pm$ 0.008bc  | 0.041 $\pm$ 0.011b                      | 0.013 $\pm$ 0.003a   | 0.043 $\pm$ 0.015b   | 0.013 $\pm$ 0.012a   | 0.050 $\pm$ 0.009b   |
|                          | Arabinose                                           | 0.45 $\pm$ 0.12c     | 0.80 $\pm$ 0.14d     | 0.37 $\pm$ 0.15c     | 1.32 $\pm$ 0.40e                        | 0.03 $\pm$ 0.02a     | 0.20 $\pm$ 0.06b     | 0.17 $\pm$ 0.12b     | 0.45 $\pm$ 0.10c     |
|                          | Ribose                                              | 1.05 $\pm$ 0.37c     | 1.82 $\pm$ 0.15d     | 1.27 $\pm$ 0.36d     | 3.72 $\pm$ 1.46e                        | 0.02 $\pm$ 0.04a     | 0.32 $\pm$ 0.12ab    | 0.61 $\pm$ 0.27b     | 0.21 $\pm$ 0.13a     |
|                          | Rhamnose                                            | 0.011 $\pm$ 0.001e   | 0.013 $\pm$ 0.001e   | 0.009 $\pm$ 0.001d   | 0.020 $\pm$ 0.004f                      | 0.002 $\pm$ 0.001a   | 0.004 $\pm$ 0.002b   | 0.007 $\pm$ 0.001c   | 0.004 $\pm$ 0.001b   |
|                          | Glycerate                                           | 1.9 $\pm$ 0.3d       | 1.8 $\pm$ 0.4d       | 1.5 $\pm$ 0.2c       | 2.1 $\pm$ 0.3d                          | 0.5 $\pm$ 0.1a       | 1.4 $\pm$ 0.4c       | 0.5 $\pm$ 0.1a       | 0.7 $\pm$ 0.2b       |
|                          | Gluconate                                           | 0.900 $\pm$ 0.037f   | 0.545 $\pm$ 0.019d   | 0.650 $\pm$ 0.022de  | 0.515 $\pm$ 0.183d                      | 0.008 $\pm$ 0.009a   | 0.133 $\pm$ 0.037c   | 0.100 $\pm$ 0.029b   | 0.079 $\pm$ 0.017b   |
|                          | Xylose                                              | 0.099 $\pm$ 0.023e   | 0.170 $\pm$ 0.012f   | 0.054 $\pm$ 0.010c   | 0.068 $\pm$ 0.002d                      | 0.025 $\pm$ 0.001b   | 0.025 $\pm$ 0.007b   | 0.010 $\pm$ 0.005a   | 0.023 $\pm$ 0.01b    |
|                          | Ribitol                                             | 1.5 $\pm$ 0.2e       | 1.6 $\pm$ 0.2f       | 1.02 $\pm$ 0.3d      | 1.5 $\pm$ 0.2e                          | 0.3 $\pm$ 0.1a       | 0.4 $\pm$ 0.1b       | 0.3 $\pm$ 0.1a       | 0.5 $\pm$ 0.1c       |
|                          | Mannitol                                            | 0.012 $\pm$ 0.002c   | 0.022 $\pm$ 0.006d   | 0.008 $\pm$ 0.002c   | 0.030 $\pm$ 0.005d                      | 0.001 $\pm$ 0.001a   | 0.002 $\pm$ 0.001ab  | 0.001 $\pm$ 0.001a   | 0.004 $\pm$ 0.001b   |
| Inositol                 | 0.7 $\pm$ 0.2c                                      | 1.7 $\pm$ 0.5d       | 0.8 $\pm$ 0.2c       | 1.7 $\pm$ 0.5d       | 0.3 $\pm$ 0.1a                          | 0.4 $\pm$ 0.1ab      | 0.3 $\pm$ 0.08a      | 0.3 $\pm$ 0.07ab     |                      |
| Phosphorylated compounds | Glucose-6-P                                         | 0.45 $\pm$ 0.10f     | 0.20 $\pm$ 0.04c     | 0.35 $\pm$ 0.07def   | 0.07 $\pm$ 0.04b                        | 0.29 $\pm$ 0.04de    | 0.11 $\pm$ 0.01c     | 0.36 $\pm$ 0.04f     | 0.07 $\pm$ 0.02a     |
|                          | Fructose-6-P                                        | 0.204 $\pm$ 0.069ef  | 0.123 $\pm$ 0.049d   | 0.185 $\pm$ 0.062def | 0.032 $\pm$ 0.022b                      | 0.175 $\pm$ 0.055de  | 0.060 $\pm$ 0.008c   | 0.223 $\pm$ 0.073f   | 0.012 $\pm$ 0.005a   |
|                          | Ribose-5-P                                          | 0.009 $\pm$ 0.003c   | 0.007 $\pm$ 0.005ab  | 0.010 $\pm$ 0.004c   | 0.004 $\pm$ 0.001a                      | 0.017 $\pm$ 0.002d   | 0.034 $\pm$ 0.009e   | 0.016 $\pm$ 0.001d   | 0.010 $\pm$ 0.001bc  |
|                          | Ribulose-5-P                                        | 0.005 $\pm$ 0.001a   | 0.002 $\pm$ 0.002a   | 0.005 $\pm$ 0.001a   | 0.002 $\pm$ 0.001a                      | 0.011 $\pm$ 0.002b   | 0.020 $\pm$ 0.001c   | 0.013 $\pm$ 0.001b   | 0.010 $\pm$ 0.002ab  |

|             |                   |                 |                 |                 |                |                 |                |                 |                 |
|-------------|-------------------|-----------------|-----------------|-----------------|----------------|-----------------|----------------|-----------------|-----------------|
|             | Seduheptulose-7-P | 0.0002±0.0029a  | 0.0086±0.0036ab | 0.0132±0.0030ab | 0.0009±0.0012a | 0.1408±0.0444d  | 0.0428±0.0103c | 0.1318±0.0442d  | 0.0094±0.0014b  |
|             | Glycerol-3-P      | 0.54±0.2e       | 0.20±0.06b      | 0.40±0.16cd     | 0.02±0.01a     | 0.48±0.16de     | 0.30±0.12c     | 0.41±0.14de     | 0.31±0.14c      |
|             | Glycerate-2-P     | 0.067±0.015cd   | 0.040±0.016bc   | 0.074±0.016cde  | 0.051±0.012bcd | 0.04±0.003bc    | 0.040±0.005b   | 0.049±0.001c    | 0.026±0.004a    |
|             | Glycerate-3-P     | 0.09±0.06b      | 0.27±0.05c      | 0.08±0.03ab     | 0.05±0.07a     | 0.76±0.11d      | 0.22±0.15c     | 0.55±0.18d      | 0.10±0.02b      |
|             | Gluconate-6-P     | 0.015±0.009a    | 0.015±0.010a    | 0.012±0.010a    | 0.025±0.006a   | 0.042±0.022ab   | 0.116±0.01c    | 0.015±0.01a     | 0.076±0.011b    |
|             | Inositol-1-P      | 0.122±0.019d    | 0.20±0.008e     | 0.091±0.024bc   | 0.108±0.038bcd | 0.058±0.011a    | 0.090±0.009bc  | 0.062±0.015a    | 0.102±0.033cd   |
| Amino acids | Alanine           | 2.0±1.4c        | 1.1±0.3ab       | 1.5±0.4b        | 1.3±0.2b       | 1.1±0.3ab       | 1.4±0.3b       | 0.5±0.1a        | 0.5±0.1a        |
|             | Valine            | 0.64±0.13e      | 0.53±0.13d      | 0.54±0.12d      | 0.75±0.10e     | 0.42±0.03b      | 0.31±0.08c     | 0.15±0.05a      | 0.26±0.06bc     |
|             | Leucine           | 0.045±0.018b    | 0.062±0.049cd   | 0.050±0.054c    | 0.234±0.045e   | 0.028±0.022b    | 0.032±0.031b   | 0.010±0.004a    | 0.062±0.051d    |
|             | Isoleucine        | 0.31±0.08d      | 0.30±0.13d      | 0.27±0.06cd     | 0.36±0.14e     | 0.23±0.04bc     | 0.23±0.02bc    | 0.14±0.01a      | 0.21±0.04b      |
|             | Proline           | 0.7±0.2b        | 3.4±1.2c        | 0.8±0.3b        | 3.1±1.4c       | 0.6±0.3ab       | 1.0±0.3b       | 0.4±0.1a        | 0.4±0.1a        |
|             | Glycine           | 0.71±0.15de     | 0.64±0.12d      | 0.43±0.12d      | 0.50±0.14d     | 0.14±0.04a      | 0.30±0.04c     | 0.13±0.04a      | 0.20±0.06b      |
|             | Norleucine        | 0.039±0.009bc   | 0.020±0.016ab   | 0.046±0.004c    | 0.047±0.01c    | 0.019±0.003ab   | 0.015±0.004a   | 0.007±0.001a    | 0.011±0.003a    |
|             | Serine            | 2.7±0.8d        | 4.5±1.5e        | 1.3±0.5c        | 4.1±1.3e       | 1.2±0.4bc       | 1.3±0.4c       | 0.5±0.1a        | 0.8±0.2ab       |
|             | Threonine         | 0.35±0.12e      | 0.41±0.14f      | 0.25±0.09d      | 0.40±0.14f     | 0.18±0.06c      | 0.18±0.06c     | 0.11±0.03a      | 0.20±0.05b      |
|             | S-Methylcysteine  | 0.0015±0.0011bc | 0.0059±0.0015e  | 0.0021±0.0014bc | 0.0054±0.0019e | 0.0011±0.0012ab | 0.0034±0.0023d | 0.0008±0.0011a  | 0.0016±0.0022ab |
|             | β-Alanine         | 0.064±0.004e    | 0.055±0.019e    | 0.045±0.011d    | 0.060±0.011e   | 0.016±0.007b    | 0.021±0.007c   | 0.017±0.002b    | 0.014±0.003a    |
|             | Homoserine        | 0.074±0.015c    | 0.094±0.007d    | 0.062±0.015bc   | 0.090±0.008d   | 0.035±0.005bc   | 0.043±0.002b   | 0.010±0.002a    | 0.021±0.004ab   |
|             | Methionine        | 0.033±0.005d    | 0.037±0.008de   | 0.043±0.009e    | 0.054±0.004f   | 0.011±0.003b    | 0.022±0.006c   | 0.002±0.0003a   | 0.013±0.003b    |
|             | Cysteine          | 0.014±0.004b    | 0.022±0.004c    | 0.012±0.001b    | 0.018±0.006c   | 0.014±0.001bc   | 0.016±0.001c   | 0.010±0.001a    | 0.014±0.001bc   |
|             | L,L-Cystathionine | 0.0040±0.0025d  | 0.0036±0.0032c  | 0.0024±0.0013b  | 0.0008±0.0002a | 0.0006±0.0013a  | 0.0012±0.0010a | 0.0010±0.0009a  | 0.0019±0.0006a  |
|             | Homocysteine      | 0.014±0.002c    | 0.025±0.002e    | 0.016±0.002d    | 0.019±0.004d   | 0.007±0.002b    | 0.012±0.002c   | 0.003±0.001a    | 0.020±0.005d    |
|             | Phenylalanine     | 0.07±0.02e      | 0.03±0.02b      | 0.08±0.01f      | 0.12±0.01g     | 0.03±0.01a      | 0.04±0.01c     | 0.03±0.01a      | 0.05±0.01d      |
|             | Arginine          | 0.0001±0.0001a  | 0.0003±0.0002a  | 0.0074±0.0050bc | 0.0079±0.0013c | 0.0079±0.0018bc | 0.0073±0.0016b | 0.0045±0.0011ab | 0.0120±0.0027d  |
|             | Histidine         | 0.024±0.001c    | 0.032±0.004d    | 0.022±0.003b    | 0.027±0.006cd  | 0.003±0.001a    | 0.003±0.001a   | 0.005±0.001a    | 0.009±0.004a    |
|             | Lysine            | 0.24±0.04d      | 0.30±0.01e      | 0.29±0.06e      | 0.53±0.15f     | 0.03±0.01a      | 0.06±0.01b     | 0.09±0.02b      | 0.12±0.01c      |
| Tyrosine    | 0.240±0.081d      | 0.201±0.002e    | 0.116±0.030bc   | 0.087±0.05bc    | 0.066±0.024ab  | 0.096±0.037bc   | 0.046±0.018a   | 0.104±0.037bc   |                 |

|                           |                            |                |                |                |                |                |                 |                |                 |
|---------------------------|----------------------------|----------------|----------------|----------------|----------------|----------------|-----------------|----------------|-----------------|
| Organic acids             | Tryptophan                 | 0.011±0.005c   | 0.011±0.002c   | 0.009±0.003bc  | 0.021±0.002bc  | 0.001±0.001a   | 0.004±0.001b    | 0.001±0.001a   | 0.005±0.002b    |
|                           | Glutamine                  | 0.46±0.17b     | 0.21±0.06a     | 0.60±0.04b     | 0.62±0.1b      | 1.06±0.36c     | 1.76±0.41d      | 0.23±0.17a     | 0.63±0.27b      |
|                           | Glutamate                  | 2.6±0.9bcd     | 3.2±0.6cde     | 1.3±0.4a       | 3.9±0.4de      | 3.3±0.3cd      | 4.1±0.4e        | 2.4±0.1b       | 1.3±0.6a        |
|                           | Ornithine                  | 0.0140±0.0024c | 0.0010±0.0005a | 0.0294±0.0045d | 0.030±0.0033d  | 0.0154±0.0064c | 0.0389±0.0090e  | 0.0114±0.0017b | 0.0220±0.0103c  |
|                           | γ-Aminobutyric acid (GABA) | 3.25±1.12cd    | 4.20±1.16d     | 5.20±1.94de    | 8.81±1.03f     | 0.18±0.06a     | 2.47±0.9bc      | 1.88±0.86b     | 1.91±0.91b      |
|                           | Pyruvate                   | 0.051±0.011c   | 0.070±0.012d   | 0.038±0.003b   | 0.026±0.015b   | 0.006±0.005a   | 0.002±0.005a    | 0.006±0.004a   | 0.003±0.004a    |
|                           | Lactate                    | 0.025±0.008b   | 0.009±0.009a   | 0.034±0.012c   | 0.070±0.003d   | 0.013±0.003a   | 0.020±0.004b    | 0.013±0.003a   | 0.011±0.011a    |
|                           | Glycolate                  | 0.062±0.010bc  | 0.089±0.018d   | 0.064±0.010bc  | 0.098±0.004d   | 0.015±0.008a   | 0.076±0.02c     | 0.016±0.01a    | 0.036±0.01b     |
|                           | Succinate                  | 0.382±0.045c   | 0.498±0.054d   | 0.157±0.023b   | 0.040±0.030a   | 0.032±0.013a   | 0.052±0.014a    | 0.061±0.016a   | 0.013±0.005a    |
|                           | Fumarate                   | 0.28±0.04c     | 0.29±0.01c     | 0.21±0.06b     | 0.22±0.07b     | 0.01±0.01a     | 0.05±0.01a      | 0.04±0.02a     | 0.03±0.01a      |
|                           | Malate                     | 2.42±0.88cd    | 3.61±0.71de    | 2.12±0.14c     | 3.05±0.49d     | 0.01±0.011a    | 0.2±0.0843b     | 0.05±0.06a     | 0.2±0.0971b     |
|                           | Pyroglutamate              | 7.0±1.2e       | 6.0±0.7d       | 5.4±1.1c       | 7.8±0.1de      | 2.1±0.7ab      | 2.5±0.7b        | 1.9±0.7ab      | 1.1±0.3a        |
|                           | L-Aspartate                | 8.4±3.0e       | 7.9±2.6d       | 7.4±2.1d       | 5.6±1.8c       | 1.9±0.9b       | 1.5±0.6ab       | 1.6±0.7ab      | 1.1±0.5a        |
|                           | Citrate                    | 1.73±0.53c     | 2.68±0.20d     | 1.29±0.43bc    | 2.38±0.10d     | 0.03±0.01a     | 0.26±0.07b      | 0.24±0.1b      | 0.11±0.05b      |
|                           | Isocitrate                 | 0.133±0.074e   | 0.119±0.032e   | 0.089±0.024de  | 0.106±0.021d   | 0.002±0.001a   | 0.033±0.018c    | 0.006±0.001ab  | 0.017±0.007ab   |
|                           | cis-Aconitate              | 0.0263±0.0060f | 0.0182±0.0041d | 0.0242±0.0061e | 0.0130±0.0045c | 0.0005±0.0003a | 0.0022±0.0014ab | 0.0045±0.0022b | 0.0021±0.0010ab |
|                           | 2-Isopropylmalate          | 0.011±0.003g   | 0.008±0.001f   | 0.006±0.001ef  | 0.004±0.001bc  | 0.006±0.002de  | 0.005±0.003cd   | 0.002±0.001a   | 0.003±0.001ab   |
|                           | α-Ketoglutarate            | 0.041±0.028d   | 0.042±0.002d   | 0.036±0.008d   | 0.058±0.013e   | 0.005±0.002b   | 0.012±0.005c    | 0.001±0.001a   | 0.005±0.001b    |
|                           | 2-Hydroxyglutarate         | 0.033±0.008e   | 0.032±0.011e   | 0.015±0.002c   | 0.020±0.005d   | 0.003±0.002a   | 0.020±0.009d    | 0.008±0.004b   | 0.003±0.001a    |
|                           | Phosphoenolpyruvate        | 0.0135±0.0032c | 0.0039±0.0012b | 0.0113±0.0032c | 0.0031±0.0018b | 0.0017±0.0003a | 0.0028±0.0001ab | 0.0003±0.0001a | 0.0005±0.0002a  |
|                           | Oxalic acid                | 0.77±0.33d     | 1.00±0.27e     | 0.70±0.21d     | 0.54±0.19cd    | 0.19±0.06a     | 0.31±0.1b       | 0.18±0.06a     | 0.23±0.08ab     |
|                           | Gluconate-1,5-lactone      | 0.080±0.009c   | 0.112±0.021d   | 0.044±0.025abc | 0.073±0.019bcd | 0.015±0.008a   | 0.022±0.002ab   | 0.016±0.008a   | 0.022±0.008a    |
|                           | Pantothenic acid           | 0.024±0.008d   | 0.014±0.009c   | 0.016±0.01c    | 0.011±0.003c   | 0.006±0.003a   | 0.011±0.004c    | 0.008±0.003b   | 0.008±0.006ab   |
|                           | Threonic acid              | 0.6±0.2bc      | 0.7±0.04c      | 1.1±0.4d       | 0.7±0.2c       | 0.5±0.1b       | 0.5±0.2b        | 0.5±0.1b       | 0.3±0.1a        |
| Threonic acid-1,4-lactone | 0.03±0.01a                 | 0.09±0.01d     | 0.04±0.02b     | 0.02±0.01a     | 0.04±0.02bc    | 0.02±0.01a     | 0.13±0.06e      | 0.05±0.01c     |                 |



|               |            |                |                |                |                |                |                |                |                |
|---------------|------------|----------------|----------------|----------------|----------------|----------------|----------------|----------------|----------------|
| Miscellaneous | Adenine    | 0.55±0.15d     | 0.44±0.15cd    | 1.20±0.42e     | 2.12±0.38f     | 0.03±0.01a     | 0.21±0.05b     | 0.54±0.2d      | 0.32±0.13c     |
|               | Adenosine  | 0.048±0.012f   | 0.004±0.003a   | 0.015±0.005c   | 0.040±0.003e   | 0.012±0.007bc  | 0.053±0.016g   | 0.009±0.002b   | 0.030±0.008d   |
|               | Guanine    | 0.019±0.002e   | 0.011±0.009d   | 0.021±0.002f   | 0.031±0.004g   | 0.005±0.001b   | 0.007±0.002c   | 0.003±0.001a   | 0.007±0.002c   |
|               | Thymine    | 0.0122±0.0026c | 0.0349±0.0060e | 0.0080±0.0062b | 0.0164±0.0042d | 0.0007±0.0021a | 0.0004±0.0023a | 0.0006±0.0022a | 0.0003±0.0019a |
|               | Uracil     | 0.0185±0.0031b | 0.0228±0.0018c | 0.0245±0.0037c | 0.0267±0.0075d | 0.0067±0.0023a | 0.0068±0.0021a | 0.0069±0.0020a | 0.0056±0.0019a |
|               | cytosine   | 0.0012±0.0052a | 0.0730±0.0235c | 0.0049±0.0054b | 0.0058±0.0054b | 0.0002±0.0012a | 0.0008±0.0014a | 0.0011±0.0013a | 0.0002±0.0016a |
|               | Putrescine | 0.058±0.006c   | 0.094±0.020e   | 0.043±0.006b   | 0.085±0.007d   | 0.018±0.004a   | 0.031±0.001b   | 0.031±0.010b   | 0.032±0.0061b  |
|               | Shikimate  | 0.042±0.028c   | 0.041±0.018c   | 0.036±0.011c   | 0.030±0.015bc  | 0.006±0.002a   | 0.031±0.011c   | 0.013±0.012a   | 0.020±0.005b   |
|               | Dopamine   | 2.6525±.1793c  | 2.2881±0.5620b | 2.8502±0.2321b | 2.4406±0.3405b | 0.0001±0.0001a | 0.0004±.0005a  | 0.0001±0.0000a | 0.0004±0.0006a |
